# Supplementary material
Source: PubMed Central journal article supplement (PMC8362266)
Supplement: NIHMS1727598-supplement-Supplemental_Material.pdf [file NIHMS1727598-supplement-Supplemental_Material.pdf]

Appendix A

Table 1

*Pearson's r correlations between food delay discounting and demographic variables*

| Variable                             | 1.    | 2.    | 3.   | 4.    | 5.    | 6.    | 7.   | 8.    | 9.   | 10.   | 11.   | 12.    | 13.    | 14.   | 15.  | 16.  | 17.  |
|--------------------------------------|-------|-------|------|-------|-------|-------|------|-------|------|-------|-------|--------|--------|-------|------|------|------|
| 1. FCQ Small [sqrt]                  | -     |       |      |       |       |       |      |       |      |       |       |        |        |       |      |      |      |
| 2. FCQ Medium [sqrt]                 | .66** | -     |      |       |       |       |      |       |      |       |       |        |        |       |      |      |      |
| 3. FCQ Large [sqrt]                  | .55** | .83** | -    |       |       |       |      |       |      |       |       |        |        |       |      |      |      |
| 4. BMI [lg10]                        | -.04  | .08   | .07  | -     |       |       |      |       |      |       |       |        |        |       |      |      |      |
| 5. PBF                               | -.01  | .00   | .04  | .82** | -     |       |      |       |      |       |       |        |        |       |      |      |      |
| 6. DAST-10 [lg10]                    | -.12  | -.20  | -.14 | -.07  | -.23* | -     |      |       |      |       |       |        |        |       |      |      |      |
| 7. AUDIT-C [lg10]                    | -.08  | -.07  | -.03 | .08   | .07   | .27** | -    |       |      |       |       |        |        |       |      |      |      |
| 8. Cigarette Use                     | -.08  | -.05  | -.07 | .27*  | .13   | .06   | .14  | -     |      |       |       |        |        |       |      |      |      |
| 9. Nicotine Vape Use                 | -.20  | -.13  | -.15 | .05   | .07   | .14   | .12  | .47** | -    |       |       |        |        |       |      |      |      |
| 10. Time Since Last Full Meal [lg10] | -.01  | .08   | .05  | .08   | .02   | .02   | .00  | .17   | .05  | -     |       |        |        |       |      |      |      |
| 11. Time Since Last Snack [lg10]     | -.03  | .04   | .02  | .06   | .07   | -.15  | -.01 | .04   | -.03 | .70** | -     |        |        |       |      |      |      |
| 12. Subjective Hunger                | .17   | .14   | .13  | -.07  | -.17  | .24*  | .15  | -.11  | -.12 | .14   | .15   | -      |        |       |      |      |      |
| 13. Slossen Intell Test              | -.06  | -.11  | -.02 | -.17  | -.09  | .08   | .04  | -.26* | -.09 | -.21* | -.18  | .20    | -      |       |      |      |      |
| 14. Income                           | .09   | .05   | .03  | .30** | .38** | -.18  | -.05 | .32** | .21* | .25*  | .29** | -.06   | -.38** | -     |      |      |      |
| 15. Marital Status                   | .05   | -.03  | -.04 | .10   | .14   | -.10  | -.05 | .13   | .08  | .27** | .26*  | .01    | -.19   | .55** | -    |      |      |
| 16. Blood Glucose (mg/dl)[lg10]      | .06   | .07   | .05  | .15   | .20   | -.10  | -.20 | .03   | .03  | -.17  | -.21* | -.28** | -.11   | .10   | .01  | -    |      |
| 17. BFFS – Fruit and Vegetable       | -.12  | .02   | .08  | -.16  | -.07  | .12   | .15  | .06   | .03  | -.07  | -.05  | -.20   | .12    | -.06  | -.10 | -.02 | -    |
| 18. Perceived Stress Survey          | .03   | -.01  | -.01 | .07   | .07   | -.06  | .07  | .10   | .03  | .25*  | .25*  | .05    | -.20   | .19   | .07  | -.01 | -.10 |

*Note.* \*<0.05 \*\*0.01 FCQ=Food Choice Questionnaire; BMI=Body Mass Index; PBF=Percent Body Fat; DAST-10=Drug Abuse Screening Test-10; AUDIT-C=Alcohol Use Disorders Identification Test-C; BFFS=Block Food Frequency Screener

Appendix B

Table 2

*Pearson's r correlations between money delay discounting and demographic variables*

| Variable                             | 1.     | 2.     | 3.     | 4.    | 5.    | 6.    | 7.   | 8.    | 9.   | 10.   | 11.   | 12.   | 13.    | 14.   | 15.  | 16.  | 17.  |
|--------------------------------------|--------|--------|--------|-------|-------|-------|------|-------|------|-------|-------|-------|--------|-------|------|------|------|
| 1. MCQ Small [lg10]                  | -      |        |        |       |       |       |      |       |      |       |       |       |        |       |      |      |      |
| 2. MCQ Medium [lg10]                 | .87**  | -      |        |       |       |       |      |       |      |       |       |       |        |       |      |      |      |
| 3. MCQ Large [lg10]                  | .81**  | .87**  | -      |       |       |       |      |       |      |       |       |       |        |       |      |      |      |
| 4. BMI [lg10]                        | .16    | .24*   | .25*   | -     |       |       |      |       |      |       |       |       |        |       |      |      |      |
| 5. PBF                               | .16    | .18    | .22*   | .82** | -     |       |      |       |      |       |       |       |        |       |      |      |      |
| 6. DAST-10 [lg10]                    | -.10   | .06    | -.01   | -.07  | -.23* | -     |      |       |      |       |       |       |        |       |      |      |      |
| 7. AUDIT-C [lg10]                    | .11    | .09    | .04    | .08   | .07   | .27** | -    |       |      |       |       |       |        |       |      |      |      |
| 8. Cigarette Use                     | .16    | .21*   | .15    | .27*  | .13   | .06   | .14  | -     |      |       |       |       |        |       |      |      |      |
| 9. Nicotine Vape Use                 | .07    | .13    | .09    | .05   | .07   | .14   | .12  | .48** | -    |       |       |       |        |       |      |      |      |
| 10. Time Since Last Full Meal [lg10] | .20    | .17    | .28**  | .08   | .02   | .02   | .002 | .17   | .05  | -     |       |       |        |       |      |      |      |
| 11. Time Since Last Snack [lg10]     | .23*   | .15    | .21*   | .06   | .07   | -.15  | -.01 | .04   | -.03 | .69** | -     |       |        |       |      |      |      |
| 12. Subjective Hunger                | .02    | .003   | -.02   | -.07  | -.17  | .24*  | .15  | -.11  | -.12 | .14   | .15   | -     |        |       |      |      |      |
| 13. Slosson Intell Test              | -.29** | -.27** | -.38** | -.17  | -.09  | .08   | .04  | -.26* | -.09 | -.21* | -.18  | .20   | -      |       |      |      |      |
| 14. Income                           | .21*   | .25*   | .29**  | .30** | .38** | -.18  | -.05 | .32** | .21* | .25*  | .29** | -.06  | -.38** | -     |      |      |      |
| 15. Marital Status                   | .08    | .06    | .06    | .06   | .14   | -.10  | -.05 | .13   | .08  | .27*  | .26*  | .006  | -.19   | .55** | -    |      |      |
| 16. Blood Glucose (mg/dl) [lg10]     | .25*   | .29**  | .33**  | .33** | .20   | -.10  | -.20 | .03   | .03  | -.17  | -.21* | -.28* | -.11   | .10   | .01  | -    |      |
| 17. BFFS – Fruit and Vegetable       | -.10   | -.20   | -.15   | -.16  | -.07  | .12   | .15  | .06   | .03  | -.07  | -.05  | -.20  | .27    | -.06  | -.10 | -.02 | -    |
| 18. Perceived Stress Survey          | .08    | .05    | .07    | .07   | .07   | -.06  | .07  | .10   | .03  | .25*  | .25*  | .05   | -.20   | .19   | .07  | -.01 | -.10 |

*Note.* \*<.05 \*\*<.01 MCQ=Money Choice Questionnaire; BMI=Body Mass Index; PBF=Percent Body Fat; DAST-10=Drug Abuse Screening Test-10; AUDIT-C=Alcohol Use Disorders Identification Test-C; BFFS=Block Food Frequency Screener

Appendix C

Table 3

*Pearson's r correlations between food probability discounting and demographic variables*

| Variable                             | 1.     | 2.     | 3.     | 4.    | 5.    | 6.    | 7.   | 8.    | 9.   | 10.   | 11.   | 12.    | 13.    | 14.   | 15.  | 16.  | 17.  |
|--------------------------------------|--------|--------|--------|-------|-------|-------|------|-------|------|-------|-------|--------|--------|-------|------|------|------|
| 1. PFCQ Small [lg10]                 | -      |        |        |       |       |       |      |       |      |       |       |        |        |       |      |      |      |
| 2. PFCQ Medium [lg10]                | .84**  | -      |        |       |       |       |      |       |      |       |       |        |        |       |      |      |      |
| 3. PFCQ Large [lg10]                 | .81**  | .92**  | -      |       |       |       |      |       |      |       |       |        |        |       |      |      |      |
| 4. BMI [lg10]                        | .12    | .13    | .15    | -     |       |       |      |       |      |       |       |        |        |       |      |      |      |
| 5. PBF                               | .15    | .17    | .22*   | .82** | -     |       |      |       |      |       |       |        |        |       |      |      |      |
| 6. DAST-10 [lg10]                    | -.31** | -.28** | -.33** | -.07  | -.23* | -     |      |       |      |       |       |        |        |       |      |      |      |
| 7. AUDIT-C [lg10]                    | -.14   | -.16   | -.11   | .08   | .07   | .27** | -    |       |      |       |       |        |        |       |      |      |      |
| 8. Cigarette Use                     | .12    | .13    | .12    | .27*  | .13   | .06   | .14  | -     |      |       |       |        |        |       |      |      |      |
| 9. Nicotine Vape Use                 | -.15   | -.05   | -.05   | .05   | .07   | .14   | .12  | .47** | -    |       |       |        |        |       |      |      |      |
| 10. Time Since Last Full Meal [lg10] | .09    | .02    | .03    | .08   | .02   | .02   | .002 | .17   | .05  | -     |       |        |        |       |      |      |      |
| 11. Time Since Last Snack [lg10]     | .12    | .02    | .10    | .06   | .07   | -.15  | -.01 | .04   | -.03 | .69** | -     |        |        |       |      |      |      |
| 12. Subjective Hunger                | .09    | .06    | .07    | -.07  | -.17  | .24*  | .15  | -.11  | -.12 | .14   | .15   | -      |        |       |      |      |      |
| 13. Slosson Intell Test              | -.11   | -.10   | -.09   | -.17  | -.09  | .08   | .04  | -.26* | -.09 | -.21* | -.18  | .20    | -      |       |      |      |      |
| 14. Income                           | .30**  | .27**  | .25*   | .30** | .38** | -.18  | -.05 | .32** | .21* | .25*  | .29** | -.06   | -.38** | -     |      |      |      |
| 15. Marital Status                   | .13    | .12    | .08    | .10   | .14   | -.10  | -.05 | .13   | .08  | .27** | .26*  | .01    | -.19   | .55** | -    |      |      |
| 16. Blood Glucose (mg/dl) [lg10]     | .12    | .09    | .04    | .15   | .20   | -.10  | -.20 | .03   | .03  | -.17  | -.21* | -.28** | -.11   | .10   | .01  | -    |      |
| 17. BFFS – Fruit and Vegetable       | .02    | -.05   | -.03   | -.16  | -.07  | .12   | .15  | .06   | .03  | -.07  | -.05  | -.20   | .12    | -.06  | -.10 | -.02 | -    |
| 18. Perceived Stress Survey          | .001   | -.03   | -.02   | .07   | .07   | -.06  | .07  | .10   | .03  | .25*  | .25*  | .05    | -.20   | .19   | .07  | -.01 | -.10 |

*Note.* \*<0.05 \*\*0.01 PFCQ=Probabilistic Food Choice Questionnaire; BMI=Body Mass Index; PBF=Percent Body Fat; DAST-10=Drug Abuse Screening Test-10; AUDIT-C=Alcohol Use Disorders Identification Test-C; BFFS=Block Food Frequency Screener

Appendix D

Table 4

*Pearson's r correlations between money probability discounting and demographic variables*

| Variable                             | 1.    | 2.    | 3.   | 4.    | 5.    | 6.    | 7.   | 8.    | 9.   | 10.   | 11.   | 12.    | 13.    | 14.   | 15.  | 16.  | 17.  |
|--------------------------------------|-------|-------|------|-------|-------|-------|------|-------|------|-------|-------|--------|--------|-------|------|------|------|
| 1. PMCQ Small [lg10]                 | -     |       |      |       |       |       |      |       |      |       |       |        |        |       |      |      |      |
| 2. PMCQ Medium [lg10]                | .77** | -     |      |       |       |       |      |       |      |       |       |        |        |       |      |      |      |
| 3. PMCQ Large [lg10]                 | .62** | .77** | -    |       |       |       |      |       |      |       |       |        |        |       |      |      |      |
| 4. BMI [lg10]                        | .12   | .13   | .07  | -     |       |       |      |       |      |       |       |        |        |       |      |      |      |
| 5. PBF                               | .06   | .07   | .13  | .82** | -     |       |      |       |      |       |       |        |        |       |      |      |      |
| 6. DAST-10 [lg10]                    | -.04  | -.16  | -.20 | -.07  | -.23* | -     |      |       |      |       |       |        |        |       |      |      |      |
| 7. AUDIT-C [lg10]                    | -.19  | -.21* | -.14 | .08   | .07   | .27** | -    |       |      |       |       |        |        |       |      |      |      |
| 8. Cigarette Use                     | .09   | .19   | .15  | .27*  | .13   | .06   | .14  | -     |      |       |       |        |        |       |      |      |      |
| 9. Nicotine Vape Use                 | -.001 | -.01  | -.07 | .05   | .07   | .14   | .12  | .47** | -    |       |       |        |        |       |      |      |      |
| 10. Time Since Last Full Meal [lg10] | -.02  | .13   | .07  | .08   | .02   | .02   | .002 | .17   | .05  | -     |       |        |        |       |      |      |      |
| 11. Time Since Last Snack [lg10]     | -.05  | .12   | .05  | .06   | .07   | -.15  | -.01 | .04   | -.03 | .69** | -     |        |        |       |      |      |      |
| 12. Subjective Hunger                | .14   | .19   | .09  | -.07  | -.17  | .24*  | .15  | -.11  | -.12 | .14   | .15   | -      |        |       |      |      |      |
| 13. Slosson Intell Test              | -.01  | -.08  | -.16 | -.17  | -.09  | .08   | .04  | -.26* | -.09 | -.21* | -.18  | .20    | -      |       |      |      |      |
| 14. Income                           | .02   | .07   | .15  | .30** | .38** | -.18  | -.05 | .32** | .21* | .25*  | .29** | -.06   | -.38** | -     |      |      |      |
| 15. Marital Status                   | -.04  | .05   | .09  | .10   | .14   | -.10  | -.05 | .13   | .08  | .27** | .26*  | .01    | -.19   | .55** | -    |      |      |
| 16. Blood Glucose (mg/dl) [lg10]     | .12   | .07   | .05  | .15   | .20   | -.10  | -.20 | .03   | .03  | -.17  | -.21* | -.28** | -.11   | .10   | .01  |      |      |
| 17. BFFS – Fruit and Vegetable       | -.07  | -.15  | .02  | -.16  | -.07  | .12   | .15  | .06   | .03  | -.07  | -.05  | -.20   | .12    | -.06  | -.10 | -.02 | -    |
| 18. Perceived Stress Survey          | -.04  | .07   | .16  | .07   | .07   | -.06  | .07  | .10   | .03  | .25*  | .25*  | .05    | -.20   | .19   | .07  | -.01 | -.10 |

*Note.* \*<.05 \*\*<.01 PMCQ=Probabilistic Money Choice Questionnaire; BMI=Body Mass Index; PBF=Percent Body Fat; DAST-10=Drug Abuse Screening Test-10; AUDIT-C=Alcohol Use Disorders Identification Test-C; BFFS=Block Food Frequency Screener
